# Supplementary material for: Construction and Validation of an E. coli Whole-Cell Biosensor Based on CadC and GFP for Heavy Metal Detection
Source: Research Square preprint supplement (doi:10.21203/rs.3.rs-8129400/v1), 2025-11-26
Supplement: Supplementary file 1 [file e6cbe5d6bae9aa105c36e42a.pdf]

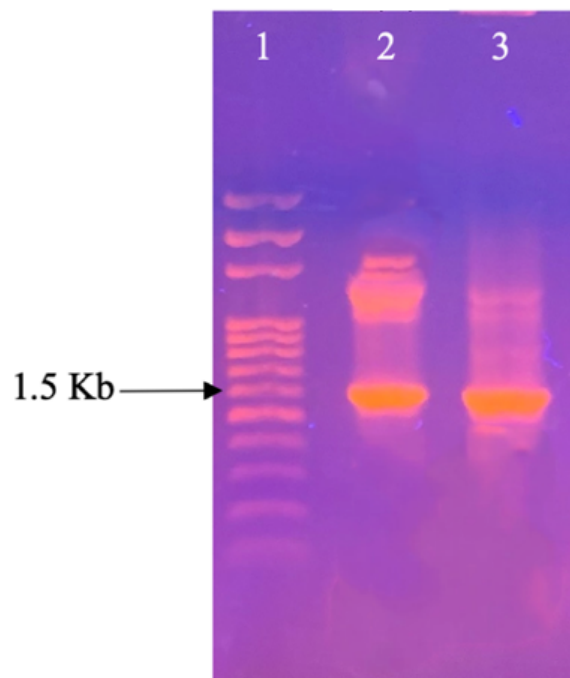

Supplementary Figure S1. Colony PCR verification of selected recombinants, Lane 1: 1Kb ladder (Promega), Lane 2-3: PCR amplification of the biosensor gene construct from selected recombinant clones.

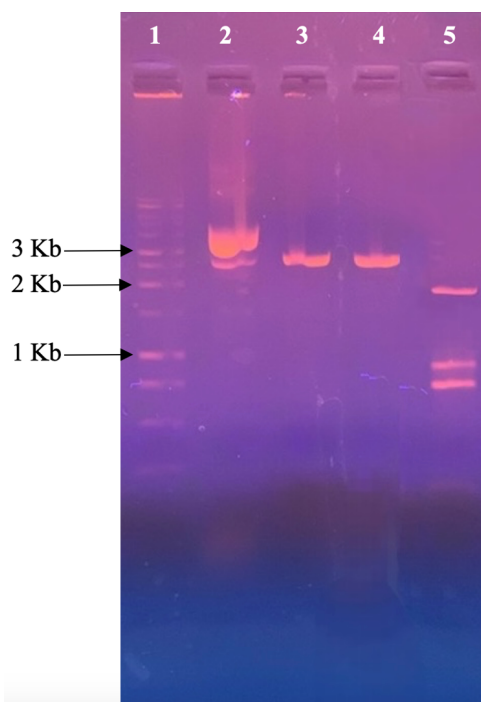

Supplementary Figure S2. Restriction enzyme digestion of pUCcad+gfp, Lane 1: 1kb ladder (Promega), Lane 2: Isolated plasmid DNA (supercoiled) of pUCcad-gfp from a positive recombinant, Lane 3: plasmid DNA digested with BamHI, Lane 4: plasmid DNA digested with Pst I, Lane 5: Digested plasmid DNA with BamHI, PstI & XbaI.

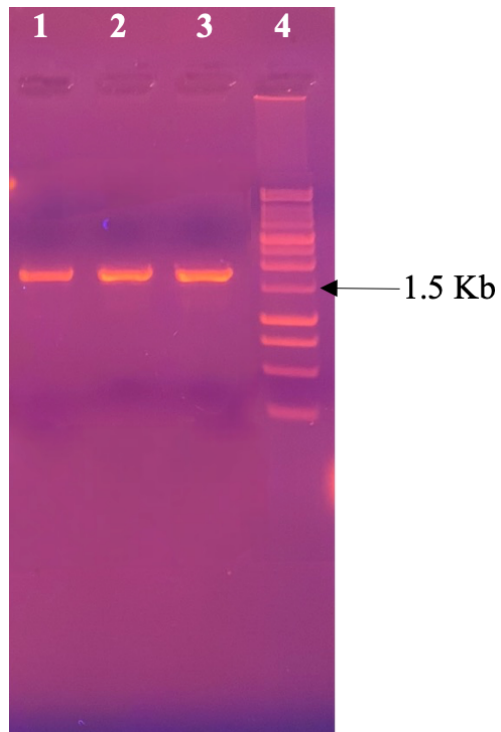

Supplementary Figure S3. PCR amplified biosensor gene construct in pET28a(+). Lane 1-3: amplified biosensor gene construct, *Pcad+cadC+gfp* (1573 bp). Lane 4: 1 kb DNA ladder (Promega).
